# Supplementary material for: Possible Regulation of Larval Juvenile Hormone Titers in Bombyx mori by BmFAMeT6
Source: MDPI journal article supplement (doi:10.3390/insects14070644), 2023-07-17
Supplement: s1 [file s1]

**Table S1.** Primer sequences.

| Name                  | Sequences (5'→3')                 |
|-----------------------|-----------------------------------|
| pBacL                 | F: CTTGACCTTGCCACAGAGGACTATTAGAGG |
|                       | R: CAGTGACACTTACCGCATTGACAAGCACGC |
| pBacR                 | F: CGATAAAACACATGCGTCAATTTTACGC   |
|                       | R: GCTCTCGACAAATAACTTTTTTGCAT     |
| <i>BmFAMeT6</i>       | F: TCCTGTCATAATGCCAACCCC          |
|                       | R: TCATTGCTACCGTGGTCCTC           |
| <i>BmFAMeT6 gRNA1</i> | GGGTTTCCTCCACCTCCACA              |
| <i>BmFAMeT6 gRNA2</i> | GGCGGATTCTGTGCAAGTGG              |
| <i>BmFAMeT6 gRNA3</i> | GAAGCGGTCCCTGAATTACC              |
| <i>Kr-h1</i>          | F: ATGATAGGTGACGAGGAGCG           |
|                       | R: CGGCAGCCATTGGTGTT              |
| SW22934               | F: TTCGTACTGGCTCTTCTCGT           |
|                       | R: CAAAGTTGATAGCAATTCCT           |
